# Supplementary material for: Performance enhancement strategies for surface plasmon resonance sensors in direct glucose detection using pristine and modified UiO-66: effects of morphology, immobilization technique, and signal amplification
Source: Royal Society of Chemistry journal article supplement (doi:10.1039/d1ta08741j), 2022-01-01
Supplement: d1ta08741j1.pdf [file d1ta08741j1.pdf]

## Supporting Information

### Performance Enhancement Strategies of Surface Plasmon Resonance Sensors in Direct Glucose Detection using Pristine and Modified UiO-66: Effects of Morphology, Immobilization Technique, and Signal Amplification

*Gilang Gumilar<sup>1,2\*</sup>, Joel Henzie<sup>3</sup>, Brian Yulianto<sup>2,4\*</sup>, Aep Patah<sup>5</sup>, Nugraha Nugraha<sup>2,4</sup>, Muhammad Iqbal<sup>2,3</sup>, Mohammed A. Amin<sup>6</sup>, Md. Shariar A. Hossain<sup>7,8</sup>, Yusuke Yamauchi<sup>3,8</sup>, Yusuf Valentino Kaneti<sup>8\*</sup>*

*<sup>1</sup> Welding and Fabrication Engineering Technology Department, Institut Teknologi Sains Bandung, Central Cikarang, Bekasi 17530, Indonesia*

*<sup>2</sup> Advanced Functional Materials (AFM) Laboratory, Engineering Physics Department, Institut Teknologi Bandung, Bandung 40132, Indonesia*

*<sup>3</sup> JST-ERATO Yamauchi Materials Space-Tectonics Project and International Center for Materials Nanoarchitectonics (WPI-MANA), National Institute for Materials Science (NIMS), 1-1 Namiki, Tsukuba, Ibaraki 305-0044, Japan*

*<sup>4</sup> Research Center for Nanoscience and Nanotechnology (RCNN), Institut Teknologi Bandung, Bandung 40132, Indonesia*

*<sup>5</sup> Inorganic & Physical Chemistry Research Division, Institut Teknologi Bandung, Bandung 40132, Indonesia*

*<sup>6</sup> Department of Chemistry, College of Science, Taif University, P. O. Box 11099, Taif 21194, Saudi Arabia*

*<sup>7</sup> School of Mechanical and Mining Engineering, The University of Queensland, St. Lucia, QLD 4067, Australia*

*<sup>8</sup> School of Chemical Engineering and Australian Institute for Bioengineering and Nanotechnology (AIBN), The University of Queensland, St. Lucia, QLD 4072, Australia*

**E-mails:** [gilang.gumilar@itsb.ac.id](mailto:gilang.gumilar@itsb.ac.id); [brian@tf.itb.ac.id](mailto:brian@tf.itb.ac.id); [v.kaneti@uq.edu.au](mailto:v.kaneti@uq.edu.au)

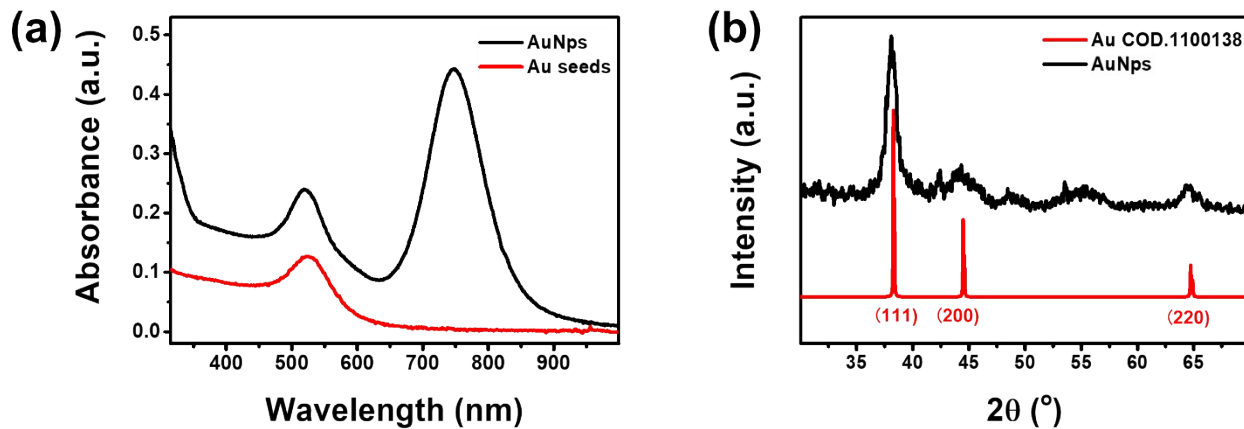

**Fig. S1.** (a) UV-vis spectra of Au seeds and AuNps, and (b) XRD patterns of synthesized AuNps and simulated Au [obtained from crystallography open database (COD) No.1100138].

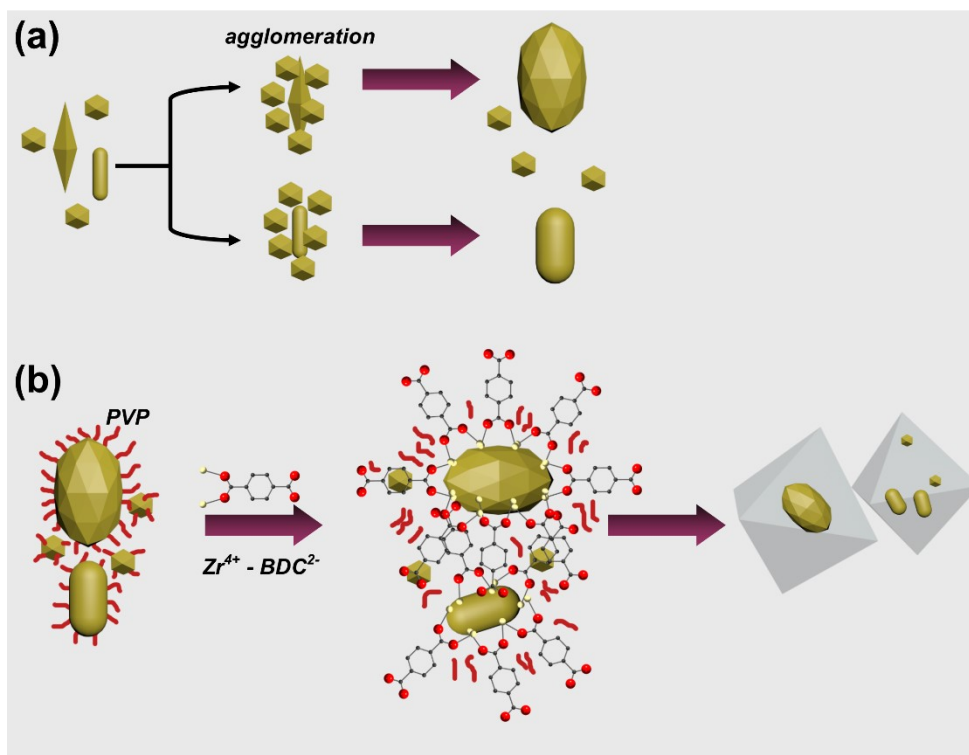

**Fig. S2.** (a) The possible transformation scheme of AuNps and (b) the hybridization process of UiO-66 with AuNps.

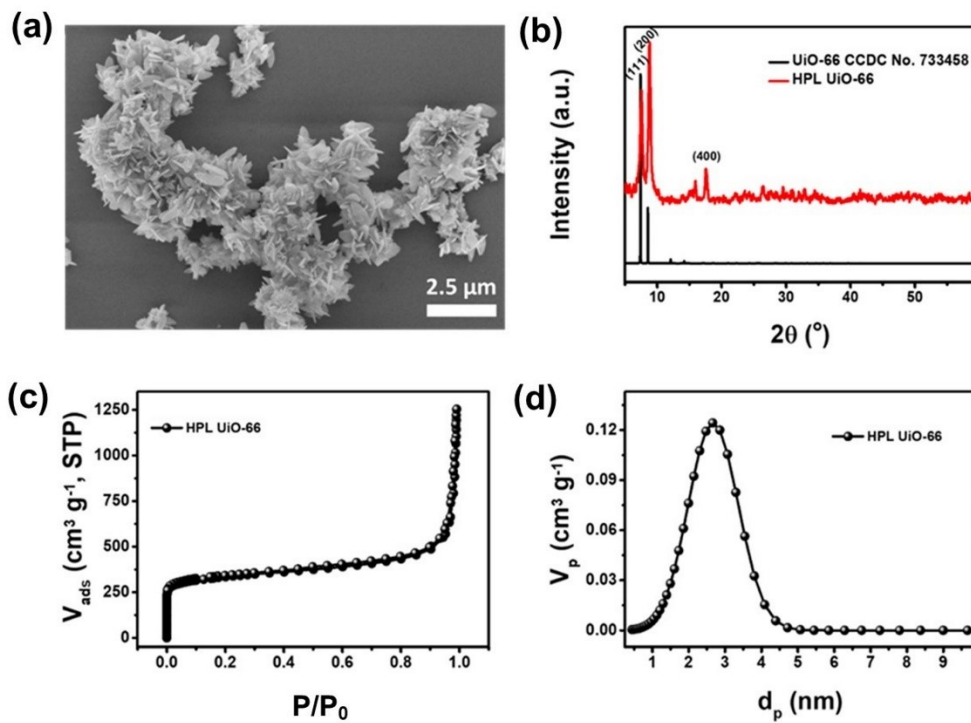

**Fig. S3.** (a) SEM image of HPL UiO-66. (b) XRD patterns of HPL UiO-66 and simulated UiO-66 from Cambridge Crystallographic Data Centre (CCDC) No. 733458. (c) N<sub>2</sub> adsorption-desorption isotherm and (d) NLDFT pore distribution plot of HPL UiO-66.

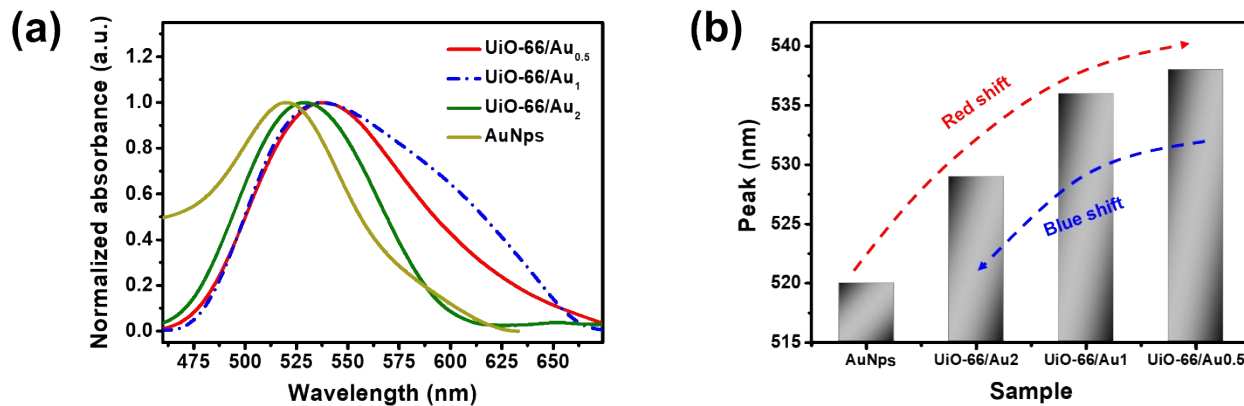

**Fig. S4.** (a) Normalized UV-vis absorption spectra of AuNps and UiO-66/Au samples in the wavelength range of 460-700 nm, showing the LSPR peak broadening. (b) The bar chart diagram of the LSPR peak position of AuNp and UiO-66/Au, showing the LSPR peak shifts.

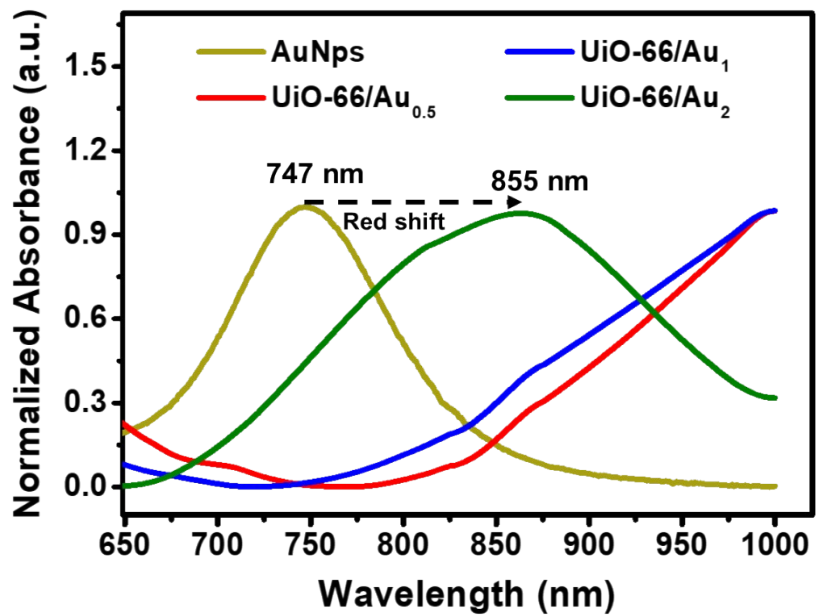

**Fig. S5.** Normalized UV-vis absorption spectra of AuNps and UiO-66/Au samples in the wavelength range of 650-1000 nm, showing the LSPR peak shifting and broadening.

**Table S1.** Refined lattice parameters of UiO-66 and UiO-66/Au samples from Rietveld refinement and the strain values of UiO-66 before and after hybridization with AuNps.

| Sample                   | $a$ (Å) | $\epsilon$ |
|--------------------------|---------|------------|
| UiO-66                   | 20.7795 | 0.000294   |
| UiO-66/Au <sub>0.5</sub> | 20.7439 | 0.00256    |
| UiO-66/Au <sub>1</sub>   | 20.7447 | 0.00392    |
| UiO-66/Au <sub>2</sub>   | 20.7646 | 0.00212    |

**Table S2.** The  $\Delta$ RU values of the SPR sensor functionalized with HPL UiO-66/SC, UiO-66/SC, and UiO-66/DA for glucose detection in the concentration range of 0.1-10 mM.

| Sample       | $\Delta$ RU for glucose concentration |        |        |        |         |        |
|--------------|---------------------------------------|--------|--------|--------|---------|--------|
|              | 0.1 mM                                | 0.5 mM | 1 mM   | 2.5 mM | 5 mM    | 10 mM  |
| HPLUiO-66/SC | 2.861                                 | 3.612  | 4.444  | 6.994  | 10.903  | 21.736 |
| UiO-66/SC    | 2.805                                 | 4.761  | 7.237  | 12.419 | 22.7402 | 27.415 |
| UiO-66/DA    | 6.921                                 | 10.539 | 13.453 | 21.644 | 24.842  | 24.709 |

**Table S3.** The  $\Delta$ RU values of the SPR sensor functionalized with UiO-66, UiO-66/Au<sub>0.5</sub>, UiO-66/Au<sub>1</sub>, and UiO-66/Au<sub>2</sub> for glucose detection in the concentration range of 0.1-10 mM.

| Sample                   | $\Delta$ RU for glucose concentration (mM) |       |        |        |         |        |         |        |
|--------------------------|--------------------------------------------|-------|--------|--------|---------|--------|---------|--------|
|                          | 0.01                                       | 0.05  | 0.1    | 0.5    | 1       | 2.5    | 5       | 10     |
| UiO-66                   | -                                          | 5.218 | 6.921  | 10.539 | 13.4523 | 21.644 | 24.842  | 24.709 |
| UiO-66/Au <sub>0.5</sub> | 3.394                                      | 8.152 | 12.073 | 15.240 | 16.589  | 18.604 | 21.3474 | 24.429 |
| UiO-66/Au <sub>1</sub>   | 0.609                                      | 2.305 | 6.8403 | 8.588  | 9.879   | 13.114 | 14.448  | 15.503 |
| UiO-66/Au <sub>2</sub>   | 1.224                                      | 1.788 | 2.820  | 4.189  | 5.585   | 7.641  | 10.130  | 13.023 |

**Table S4.** The  $\Delta$ RU values of glucose detection in PBS and human serum + PBS solutions using UiO-66/Au<sub>0.5</sub>.

| Concentration (mM) | $\Delta$ RU |                   | Recovery (%) |
|--------------------|-------------|-------------------|--------------|
|                    | PBS         | Human serum + PBS |              |
| 0.01               | 3.39429     | 1.273279          | 37.51238     |
| 0.05               | 8.1521      | 6.48006           | 79.48946     |
| 0.1                | 12.07335    | 9.70265           | 80.36419     |
| 0.5                | 15.24018    | 12.68718          | 83.24823     |
| 1                  | 16.58947    | 14.97328          | 90.25774     |
| 2.5                | 18.60416    | 19.4169           | 104.3686     |
| 5                  | 21.34749    | 22.13525          | 103.6902     |
| 10                 | 24.42883    | 23.96072          | 98.08378     |



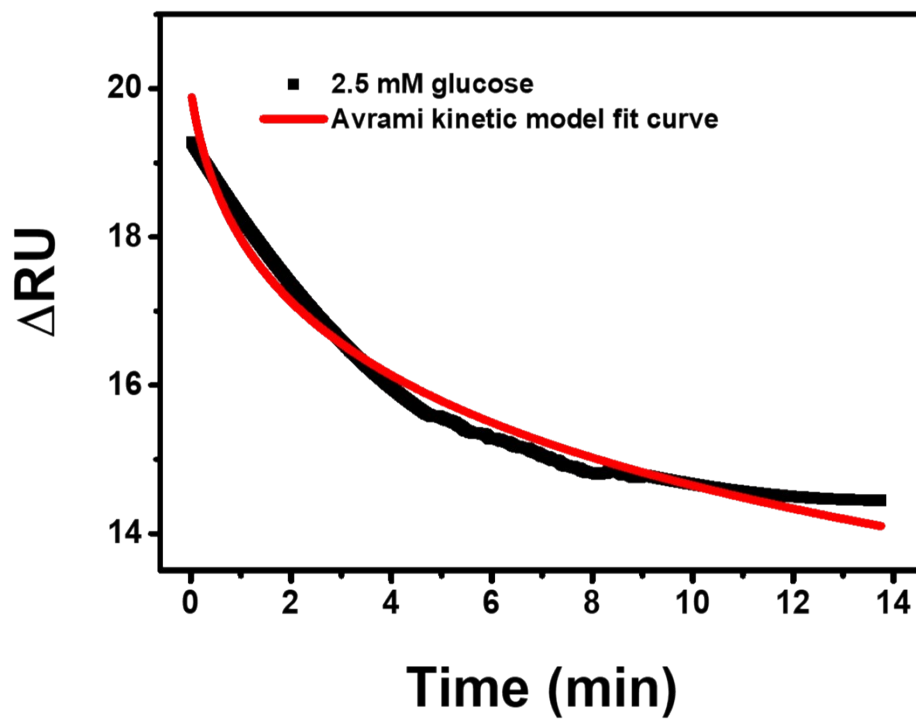

**Fig. S6.** The non-linear fitting curve of Avrami's kinetic adsorption model on 2.5 mM glucose dissociation experimental data of UiO-66/Au<sub>0.5</sub>.
